# Supplementary material for: Secondary coordination sphere controlled reversible geometry reorganisations in copper(ii) complexes
Source: Royal Society of Chemistry journal article supplement (doi:10.1039/b407229d), 2004-01-01
Supplement: b407229d.doc [file b407229d.doc]

**Secondary Coordination Sphere Controlled Geometry Reorganisations in Copper(II) Complexes**

John Fieldena, De-Liang Longa and Leroy Cronina*

a University of Glasgow, Department of Chemistry, Joseph Black Building, University Avenue, Glasgow, G12 8QQ,, United Kingdom. E-mail: L.Cronin@chem.gla.ac.uk

**Experimental Details**

**General**

Where described as dry, methanol was distilled from magnesium. All other reagents were used as received. FTIR spectra were run on a JASCO *FTIR 410* spectrometer and manipulated using JASCO software. UV-visible spectra were collected on a Shimadzu *UV-3101PC* spectrometer and manipulated using Shimadzu software. Details of X-ray diffraction experiments are included in the crystallographic data section.

***syn*-*bis*[*cis*-3,5-diamino-*trans*-hydroxycyclohexane-κ2-N,N’]-fluorocopper(II) fluoride (*syn*-[Cu(DAHC)2F](F)·2CH3OH·H2O) (1)**

Solid CuF2 (0.0286g, 0.282mmol) was added to a solution of *cis*-3,5-diamino-*trans­-*hydroxycyclohexane (0.0703g, 0.54mmol) in methanol (20ml, supplied containing 0.05% (10μl) water, therefore 0.56mmol water present). The solution gradually became purple with stirring overnight, whereupon it was reduced in volume to *ca* 2 ml and set to crystallise by diffusion of ether. After 24 hours blue crystals of *syn*-*bis*[*cis*-3,5-diamino-*trans*-hydroxycyclohexane-κ2-N,N’]-fluorocopper(II) fluoride (**1**) were observed in all four crystallisation tubes and recovered from two (0.0210g, 35% yield). These crystals rapidly became red upon exposure to air. FTIR (KBr disc) υ / cm-1: 3420 s, 3201 s, 3040 s, 2946 s, 2896 s, 1614 m, 1368 m, 1226 m, 1075 s, 919 m. UV-vis (dry MeOH) λ / nm (ε / L mol-1 cm-1): 356 (1837), 577 (80). Elemental analysis for C12H30CuF2N4O3 (**1**, methanol removed by drying under high vacuum) Calcd (Found) %: C 37.94 (38.14), H 7.96 (8.63), N 14.75 (14.51).[[1]](#endnote-2)

***anti-bis*[*cis*-3,5-diamino-*trans*-hydroxycyclohexane-κ2-N,N’]copper(II) difluoride (*anti*-[Cu(DAHC)2](F)2·2H2O)** **(2)**

Addition of water (5 μl, 0.28 mmol) to both remaining vials from **1**, each containing blue crystals of compound **1** (0.025 mmol, a further 0.045 mmol present as the dissolved species) in 1 ml of mother liquor (1:1 methanol : ether), resulted in disappearance of the blue crystals and replacement with red crystals of *anti-bis*[*cis*-3,5-diamino-*trans*-hydroxycyclohexane-κ2-N,N’]copper(II) difluoride (**2**) (0.013g, 24% yield). IR (KBr disc) υ / cm-1: 3417 s, 3197 s, 3029 s, 2929 s, 2894 s, 1614 m, 1367 m, 1224 w, 1074 s, 917 w. UV-vis (MeOH) λ / nm (ε / L mol-1 cm-1): 359 (1940), 581 (80). Elemental analysis for C12H32CuF2N4O4, Calcd (Found): C 36.22 (36.01), H 8.11 (7.94), N 14.08 (13.85). Redissolution of the red crystals in dry methanol (0.5 ml) and crystallization by diffusion of ether resulted in the formation of blue crystals which were shown by X-ray diffraction (unit cell determination of one single crystal) to be **1**.

**Crystallographic Data**

Crystal data for *syn*-[Cu(DAHC)2F](F)·2CH3OH·H2O (C14H38CuF2N4O5) (**1**): monoclinic, *Pc*, *a* = 10.2410(2) Å, *b* = 7.03400(10) Ǻ, *c* = 14.9794(2) Ǻ, *β* = 111.4970(10)o, *V* = 1003.98(3) Å3, *Z* = 2, *ρ*calcd = 1.468 g cm-3, μ(Mo-Kα) = 1.137 mm-1, 12637 reflections measured, 3615 unique which were used in all calculations. Final *R*1 = 0.0210 and *wR*2 = 0.0525 (all data). Data were measured at 150(2)K on a Nonius KappaCCD diffractometer [λ(Mo-Kα) = 0.71073 Å], graphite monochromator. Structure solution and refinement were performed by using SHELXS-97 and SHELXL-97 *via* WinGX.[[2]](#endnote-3) CDDC reference number 239722. See <http://www.rsc.org/suppdata/cc/b4/b407229d> for crystallographic data in CIF or other electronic format.

Crystal data for *anti*-[Cu(DAHC)2](F)2·2H2O (C12H32CuF2N4O4) (**2**): triclinic, *P*, *a* = 7.0993(2) Å, *b* = 7.1315(2) Ǻ, *c* = 10.0059(3) Ǻ, *α* = 108.5670(10)o *β* = 92.2330(10)o, *γ* = 112.9120(10)o, *V* = 434.56(2) Å3, *Z* = 1, *ρ*calcd = 1.521 g cm-3, μ(Mo-Kα) = 1.300 mm-1, 7086 reflections measured, 1974 unique which were used in all calculations. Final *R*1 = 0.0197 and *wR*2 = 0.0524 (all data). Data collection and structure solution apply the same procedures as for compound **1**. CDDC reference number 239723. See <http://www.rsc.org/suppdata/cc/b4/b407229d> for crystallographic data in CIF or other electronic format.

1. The high reading for hydrogen is likely to be due to the hygroscopic nature of dried compound **1**. The reading is only just outside the accepted error for such measurements (±0.5%). [↑](#endnote-ref-2)
2. L. J. Farrugia, *J. Appl. Crystallogr.*, 1999, **32**, 837. [↑](#endnote-ref-3)
